# Supplementary material for: Rapid, simplified whole blood-based multiparameter assay to quantify and phenotype SARS-CoV-2-specific T-cells
Source: PubMed Central journal article supplement — Eur Respir J. 2022 Jan 13;59(1):2100285. doi: 10.1183/13993003.00285-2021 (PMC8215505; doi:10.1183/13993003.00285-2021), 2022-01-13

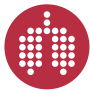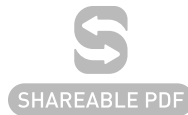

# Rapid, simplified whole blood-based multiparameter assay to quantify and phenotype SARS-CoV-2-specific T-cells

Catherine Riou <sup>1,2</sup>, Georgia Schäfer <sup>1,3,4</sup>, Elsa du Bruyn <sup>1,5</sup>, Rene T. Goliath <sup>1</sup>, Cari Stek <sup>1,5,6</sup>, Huihui Mou <sup>7</sup>, Deli Hung <sup>8</sup>, Katalin A. Wilkinson <sup>1,5,9</sup> and Robert J. Wilkinson <sup>1,5,6,9</sup>

<sup>1</sup>Wellcome Centre for Infectious Disease Research in Africa and Institute of Infectious Disease and Molecular Medicine, University of Cape Town, Observatory, South Africa. <sup>2</sup>Division of Medical Virology, Dept of Pathology, University of Cape Town, Observatory, South Africa. <sup>3</sup>International Centre for Genetic Engineering and Biotechnology (ICGEB) Cape Town, Observatory, South Africa. <sup>4</sup>Division of Medical Biochemistry and Structural Biology, Dept of Integrative Biomedical Sciences, University of Cape Town, Observatory, South Africa. <sup>5</sup>Dept of Medicine, University of Cape Town, Observatory, South Africa. <sup>6</sup>Dept of Infectious Diseases, Imperial College London, London, UK. <sup>7</sup>Dept of Immunology and Microbiology, The Scripps Research Institute, Jupiter, FL, USA. <sup>8</sup>Dept of Immunology and Microbiology, The Scripps Research Institute, La Jolla, CA, USA. <sup>9</sup>The Francis Crick Institute, London, UK.

Corresponding author: Catherine Riou ([cr.riou@uct.ac.za](mailto:cr.riou@uct.ac.za))

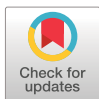

Shareable abstract (@ERSpublications)

This proof-of-concept study shows that SARS-CoV-2 T-cell responses are easily detectable using a rapid whole blood assay requiring minimal blood volume. Such assay represents a suitable tool to monitor adaptive immunity in vaccine trials. <https://bit.ly/3yZHTcL>

Cite this article as: Riou C, Schäfer G, du Bruyn E, *et al.* Rapid, simplified whole blood-based multiparameter assay to quantify and phenotype SARS-CoV-2-specific T-cells. *Eur Respir J* 2022; 59: 2100285 [DOI: 10.1183/13993003.00285-2021].

This single-page version can be shared freely online.

Copyright ©The authors 2022.

This version is distributed under the terms of the Creative Commons Attribution Non-Commercial Licence 4.0. For commercial reproduction rights and permissions contact [permissions@ersnet.org](mailto:permissions@ersnet.org)

This article has supplementary material available from [erj.ersjournals.com](http://erj.ersjournals.com)

Received: 29 Jan 2021  
Accepted: 26 May 2021

## Abstract

**Background** Rapid tests to evaluate severe acute respiratory syndrome coronavirus 2 (SARS-CoV-2)-specific T-cell responses are urgently needed to decipher protective immunity and aid monitoring vaccine-induced immunity.

**Methods** Using a rapid whole blood assay requiring a minimal amount of blood, we measured qualitatively and quantitatively SARS-CoV-2-specific CD4 T-cell responses in 31 healthcare workers using flow cytometry.

**Results** 100% of COVID-19 convalescent participants displayed a detectable SARS-CoV-2-specific CD4 T-cell response. SARS-CoV-2-responding cells were also detected in 40.9% of participants with no COVID-19-associated symptoms or who tested PCR-negative. Phenotypic assessment indicated that, in COVID-19 convalescent participants, SARS-CoV-2 CD4 responses displayed an early differentiated memory phenotype with limited capacity to produce interferon (IFN)- $\gamma$ . Conversely, in participants with no reported symptoms, SARS-CoV-2 CD4 responses were enriched in late differentiated cells, coexpressing IFN- $\gamma$  and tumour necrosis factor- $\alpha$  and also Granzyme B.

**Conclusions** This proof-of-concept study presents a scalable alternative to peripheral blood mononuclear cell-based assays to enumerate and phenotype SARS-CoV-2-responding T-cells, thus representing a practical tool to monitor adaptive immunity due to natural infection or vaccine trials.

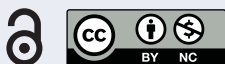

Supplement: ERJ-00285-2021.Shareable.pdf [file ERJ-00285-2021.Shareable.pdf]
