# Supplementary material for: Rapid, simplified whole blood-based multiparameter assay to quantify and phenotype SARS-CoV-2-specific T-cells
Source: PubMed Central journal article supplement — Eur Respir J. 2022 Jan 13;59(1):2100285. doi: 10.1183/13993003.00285-2021 (PMC8215505; doi:10.1183/13993003.00285-2021), 2022-01-13
Supplement: ERJ-00285-2021.SUPPLEMENT.pdf [file ERJ-00285-2021.SUPPLEMENT.pdf]

1 **Online supplement for:**

2

3 **Rapid, simplified whole blood-based multiparameter assay to quantify and phenotype**

4 **SARS-CoV-2 specific T cells**

5

6 Catherine Riou<sup>1,2,\*</sup>, Georgia Schäfer<sup>1,3,4</sup>, Elsa du Bruyn<sup>1,5</sup>, Rene T. Goliath<sup>1</sup>, Cari Stek<sup>1,5,6</sup>, Huihui

7 Mou<sup>7</sup>, Deli Hung<sup>8</sup>, Katalin A. Wilkinson<sup>1,5,9</sup>, Robert J. Wilkinson<sup>1,5,6,9</sup>

8

9 <sup>1</sup> Wellcome Centre for Infectious Disease Research in Africa and Institute of Infectious Disease  
10 and Molecular Medicine, University of Cape Town, Observatory 7925, South Africa

11 <sup>2</sup> Division of Immunology, Department of Pathology, University of Cape Town, Observatory  
12 7925, South Africa

13 <sup>3</sup> International Centre for Genetic Engineering and Biotechnology (ICGEB) Cape Town,  
14 Observatory 7925, South Africa

15 <sup>4</sup> Division of Medical Biochemistry and Structural Biology, Department of Integrative  
16 Biomedical Sciences, University of Cape Town, Observatory 7925, South Africa

17 <sup>5</sup> Department of Medicine, University of Cape Town, Observatory 7925, South Africa

18 <sup>6</sup> Department of Infectious Diseases, Imperial College London, W12 0NN, UK

19 <sup>7</sup> Department of Immunology and Microbiology, The Scripps Research Institute, Jupiter, FL  
20 33458, USA

21 <sup>8</sup> Department of Immunology and Microbiology, The Scripps Research Institute, La Jolla, CA  
22 92037, USA

23 <sup>9</sup> The Francis Crick Institute, London, NW1 1AT, UK

24

| <b>Markers</b>                | <b>Fluorochrome</b> | <b>Clone</b> | <b>Company</b> | <b>Cat. Number</b> | <b>Role</b>            |
|-------------------------------|---------------------|--------------|----------------|--------------------|------------------------|
| <b>CD3</b>                    | BV650               | OKT3         | BioLegend      | 317323             | Lineage                |
| <b>CD4</b>                    | BV785               | OKT4         | BioLegend      | 317428             |                        |
| <b>CD8</b>                    | BV510               | RPA-T8       | BioLegend      | 301048             |                        |
| <b>CD45RA</b>                 | Alexa 488           | HI100        | BioLegend      | 304114             | Memory differentiation |
| <b>CD27</b>                   | PE-Cy5              | 1A4CD27      | Beckman        | 6607107            |                        |
| <b>CD38</b>                   | APC                 | HIT2         | BD Bioscience  | 555462             | Activation             |
| <b>HLA-DR</b>                 | BV605               | L243         | BioLegend      | 307640             |                        |
| <b>Ki67</b>                   | PerCP-Cy5.5         | B56          | BD Bioscience  | 561284             |                        |
| <b>PD-1</b>                   | PE                  | EH12.2H7     | BioLegend      | 329906             |                        |
| <b>GrB</b>                    | BV421               | GB11         | BD Bioscience  | 563388             | Cytotoxic potential    |
| <b>IFN<math>\gamma</math></b> | BV711               | 4S.B3        | BioLegend      | 502540             | Functions              |
| <b>TNF<math>\alpha</math></b> | PE-Cy7              | MAB11        | BioLegend      | 502930             |                        |
| <b>IL-2</b>                   | PE/Dazzle™ 594      | MQ1-17H12    | BioLegend      | 500344             |                        |

**Supp table 1:** Description of the antibody panel used in the study.

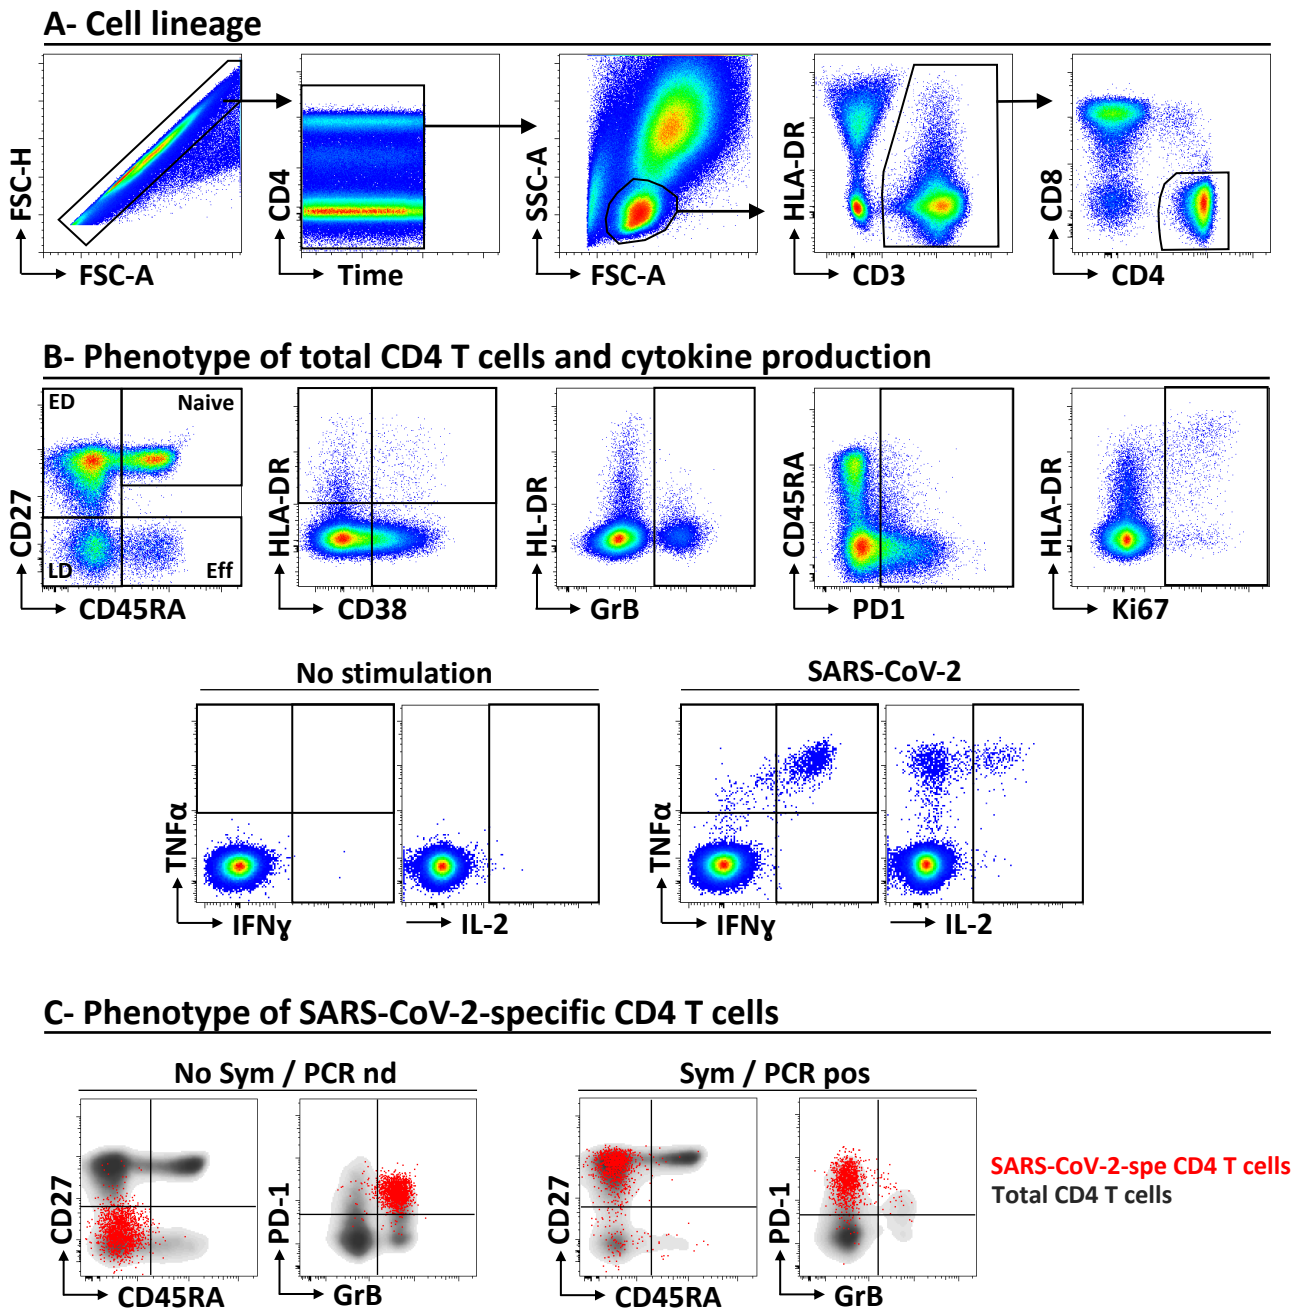

**Supp Figure 1:** Gating strategy used to identify SARS-CoV-2 specific CD4 T cells and defined their phenotypic characteristics. **A-** Cell lineage. **B-** Phenotyping of total CD4 T cell and cytokine production in response to SARS-CoV-2 peptides. **C-** Phenotype of SARS-CoV-2 responding CD4 T cells in one participant with no symptom (left) and one COVID-19 confirmed participant (right). SARS-CoV-2-specific CD4 T cells (expressing any measured cytokine) are depicted in red.

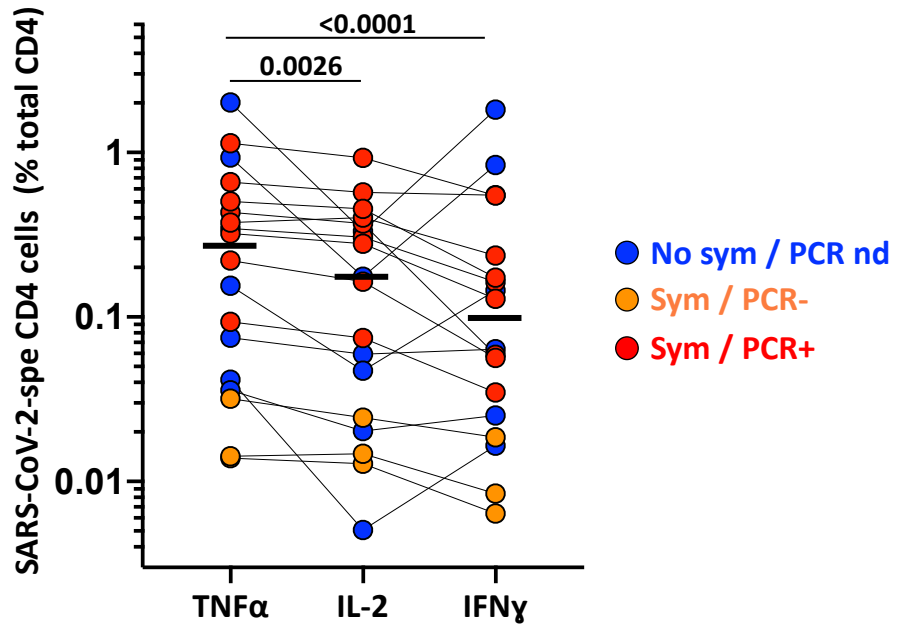

**Supp Figure 2: Comparison of magnitude of SARS-CoV-2-specific CD4 T cell response expressing TNF $\alpha$ , IL-2 or IFN $\gamma$  in participants exhibiting a detectable response to SARS-CoV-2 peptide pool.** Each dot represent a participant and is color-coded according to clinical characteristics (Blue represents no symptoms, no SARS-CoV-2 PCR performed; Orange: self-reported symptoms, SARS-CoV-2 PCR negative and Red: self-reported symptoms, SARS-CoV-2 PCR positive). Black bars indicate medians. Statistical comparisons were performed using a nonparametric paired Friedman test.
